# Supplementary material for: MCP-1-CCR2-M2 macrophages axis contributes to diffuse large B-cell lymphoma progression and inhibits antitumor immune response
Source: Research Square preprint supplement (doi:10.21203/rs.3.rs-6219553/v1), 2025-05-20
Supplement: Supplementary file 1 [file 7025097eeefb07035cbbd256.pdf]

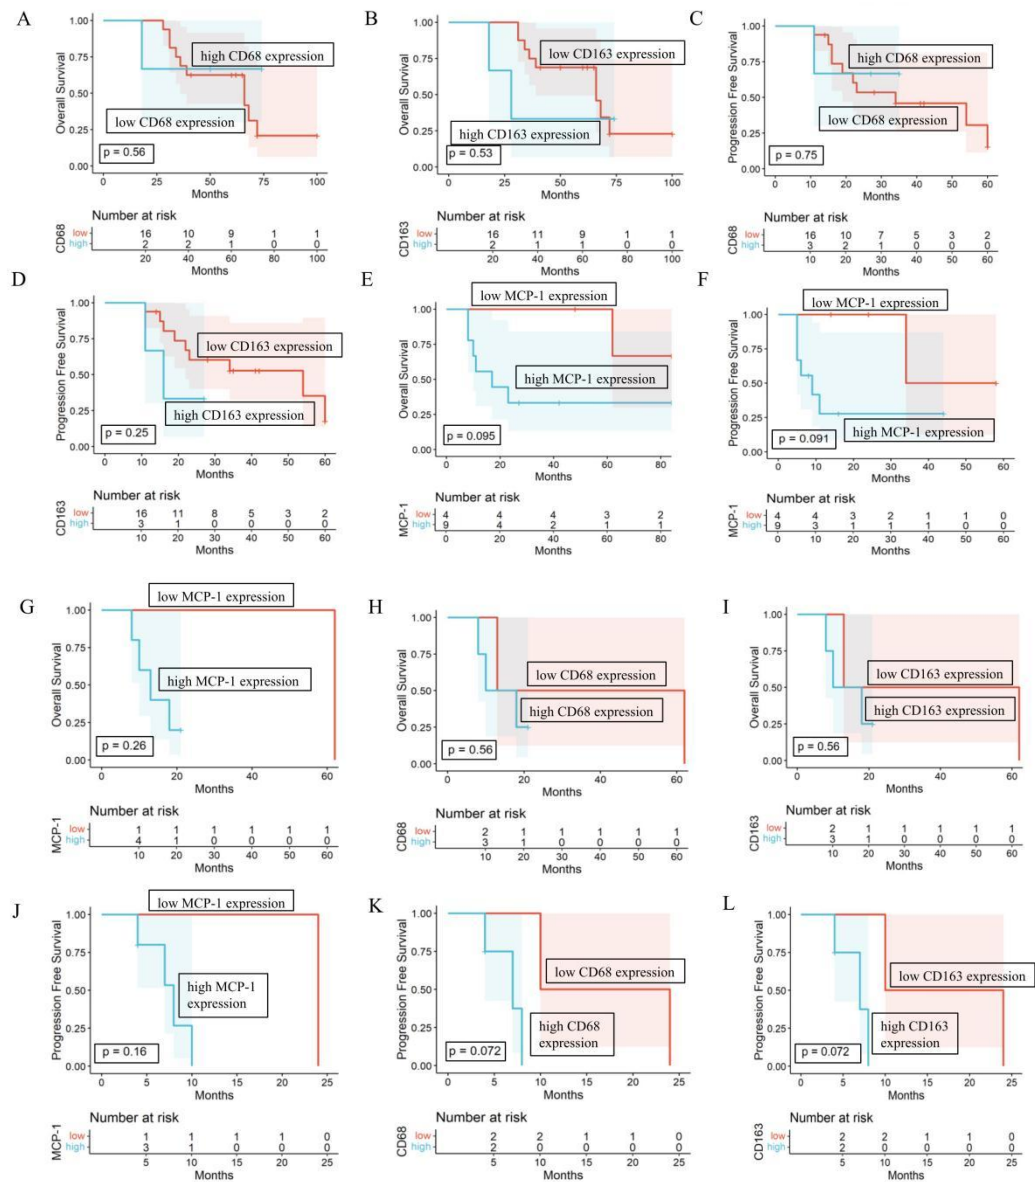

**Supplementary Fig. 1. Kaplan-Meier analysis of OS and PFS was performed according to the expression of MCP-1, CD68, and CD163 in different levels of risk. OS and PFS in IPI score=0-1 (A-D), OS and PFS in IPI score = 2-3 (E,F), OS and PFS in IPI score = 4-5 (G-L); P value was calculated by log-rank test.**
